# Supplementary material for: Iron Acquisition in Mycobacterium avium subsp. paratuberculosis
Source: PubMed Central journal article supplement (PMC4810606; doi:10.1128/jb.00922-15), 2016-02-12
Supplement: JB.00922-15_zjb999093954so1.pdf [file JB.00922-15_zjb999093954so1.pdf]

**Fig. S1**

**A.**

|           |                                                              |      |
|-----------|--------------------------------------------------------------|------|
| MAH_mbTE  | gcgctggtggaccgcgacgacgtggacccgcgggcgggccgactgcgaccgccccacccc | 5100 |
| MAPC_mbTE | GCGCTGGTGGACC-----GCGACCGCCCCACCCC                           | 5069 |
| MAPS_mbTE | gcgctggtggacc-----gcgaccgccccacccc                           | 4917 |
|           | *****                                                        |      |

  

**B.**

|           |                                                              |      |
|-----------|--------------------------------------------------------------|------|
| MAH_mbTE  | cgctgcagtagccgactacgcgccctggcagcgacgcttctcggtgacgctggcggc    | 3780 |
| MAPC_mbTE | CGCTGCAGTAGCCGACTACGCGCCCTGGCAGCGACGTTTCTCGGTGACGCCGGCGGC    | 3780 |
| MAPS_mbTE | cgctgcagtagccgactacgcgccctggcagcgacgcttctcggtgacgctggcggc--  | 3778 |
|           | *****                                                        |      |
| MAH_mbTE  | caggagtccgcggttgcgggtgcccagcgagtagtggaccggcagctggccgggctg    | 3840 |
| MAPC_mbTE | CAGGAGTCCGCGGTTGCCGGTGCCGACGCGGAGTACTGGACCCGGCAGCTGGCCGGGTTG | 3840 |
| MAPS_mbTE | -----                                                        | 3778 |
| MAH_mbTE  | ccggaggacaccgggctgccccgacttcccgcgccagccggtgcccagcggggacggc   | 3900 |
| MAPC_mbTE | CCGGAGGACACCGGACTGCGTCCGGACTTCCC GCGCCAGCCGGTGCCAGCGGGGACGGC | 3900 |
| MAPS_mbTE | -----                                                        | 3778 |
| MAH_mbTE  | gaatccgtcgacttccacatcgacgcggccaccagggccaagctcgccgacgtgtgccgc | 3960 |
| MAPC_mbTE | GAATCCGTCGACTTCCACATCGACGCGGCCACCAGGGTCAAGCTCGCCGAGGTGTGCCGC | 3960 |
| MAPS_mbTE | -----gccagggtcaagctcgccgaggtgtgccgc                          | 3808 |
|           | *****                                                        |      |

**Multiple alignment of *mbtE* nucleotide sequences.** Alignment was generated using Clustal Omega using default settings on Oct 31, 2015.

**A)** Nucleotide sequence showing common deletion event at 5,053 in MAP-cattle and -sheep genomes, relative to the MAH genome

**B)** Nucleotide sequence showing deletion event at 3,778 specific to the MAP-sheep genome, relative to the MAH and MAP-cattle genomes.

## Fig. S2

START →

4220100

```
atggcgacgggtggcgcgatgfgccgctcggggggccagccgggggcccgggacggggccggcgccacccggcgcgcgacccggggtccggaa
agtcctccgcaatagatgataaacgggtatcgttggcgggtggggtgctctcgggggacggcccccctatcctactgctctggtgctgacagtcgt
aacgagttgctcgaagcccgaccacaacagccgaggggggtccgtaatgcccctcccaicagccatggcagaacggccggcggcggcggcgtgcccac
cggcccaactcgtcgtcgtggtcagcgtggtcagcggggggcgcacatgctcgcagctggggggcgcctcggcgaacgcaagaccgctcgcacagctcgc
ggcgaaccgacgattacgagccgcaaccggccgacggcgtgacttatgaaacgcaaaactatcgtggaacggcggcaggggtacgactcgtgggcat
ccaagctggcggcagctccgttccgggcccctgggtgagcggcggcggcagcagcaaacaccggatggagcaaacctcaactggtg
```

4219501

```
ACAGGTTGGCTGATAAGTCCCGGTC TCTAGACCCTATAGTGAGTCGTATTACAAACTGGAACAACACTC
AACCCATATCTCGGTCTATTCTTTGATTTATAAGGGATTTTGCCGATTCGGCCTATTGGTTAAAAAATGAGC
TGATTTAACAAAAATTAACCGCAATTTAACAAAAATTAACCGTTACAATTTAGGTGGCACTTTTCGGGGAA
AATGTGCGCGGAACCAAGATCCCCACGATGCGTCCGGCTAGAGGATCTGAAGATCAGCAGTTC AACCTGT
TGATAGTACGTACTAAGCTCTCATGTTTCACGTACTAAGCTCTCATGTTTAAACGTAATAAGCTCTCATGTTT
ACGAATAAACCCCTCATGGCTAACGTACTAAGCTCTCATGGCTAACGTACTAAGCTCTCATGTTTACGTAC
TAAGCTCTCATGTTTGAACAATAAAATTAATATAAATCAGCAACTTAAATAGCCTCTAAGGTTTAAAGTTTAT
AAGAAAAAAGAATATATAAGGCTTTTAAAGCTTTTAAAGGTTTAAACGGTTGTGGACAACAAGCCAGGGATG
TAACGCACTGAGAAGCCCTTAGAGCCTCTCAAAGCAATTTTCAAGTACACAGGAACACTTAAACGGCTGACA
GAATTCITGAAGACGAAAGGGCCTCGTGATACGCCATTTTTATAGGTTAATGTCATGATAATAATGGTTTC
TTAGACGTCAGGTGGCACTTTTCGGGGTTATAAGGGTGCAGGAATTCGATATCAAGCTTATCGATACCGT
CGACCTCGAGGGGGGGCCCGGTACCGAGGACCGCTCGAATTAATFCCGCTAGCTTACGCTGCCGCAAG
CACTCAGGGGCCAAGGGCTGCTAAAGGAAGCGGAACACGTAAGAAAGCCAGTCCGCAGAAAACGGTGCTGA
CCCCGGATGAATGTCAGTACTAGGCTATCTGGACAAGGGAAAACGCAAGCGCAAAGAGAAAAGCAGGTAG
CTTGCAGTGGCTTACATGGCGATAGCTAGACTGGGGGTTTTATGGACAGCAAGCGAAACCGGAATTGCC
AGCTGGGGCGCCCTCGGTAAGGTTGGGAAGCCCTGCAAAAGTAACTGGATGGCTTTCTTGGCCCAAGG
ATCTGATGGCCAGGGGATCAAGATCTGATCAAGAGACAGGATGAGGATCGTTTCGCATGATTGAACAAG
ATGGATTGCACGAGGTTCTCCGGCCGCTTGGGTGGAGAGGCTATTCGGCTATGACTGGGCACAACAGAC
AATCGGCTGCTCTGATGCCGCCGTTTCCGGCTGTCAGCGCAGGGGCGCCCGGTTCTTTTGTCAAGACC
GACCTGTCCGGTGCCCTGAATGAATCCAAGACGAGGACGCGCGGCTATCGTGGCTGGCCACGACCGGGC
GTTCTTGGCAGCTGTGCTCGACGTTGTCACTGAAGCGGGAAAGGGACTGGCTGCTATTGGGGCAAGTGC
CGGGGACAGGATCTCTGTATCTCACCTGCTCCTGCCGAGAAAGTATCCATCATGGCTGATGCAATGCG
GCGGCTGCATACGCTTGATCCGGCTACCTGCCATTCCGACCACCAAGCGAAAACATCGCATCGAGCGAGCA
CGTACTCGGATGGAAGCCGGTCTTGTGATCAGGATGATCTGGACGAAGAGCATCAGGGGCTCGCGCA
GCCGAACTGTTCCGACGGCTCAAGGCGCGGATGCCCGACGGCGAGGATCTCGTCTGTAACCATGGCGAT
GCCTGCTTGGCAATATCATGGTGGAAAATGGCCGCTTTTCTGGATTTCATCGACTGTGGCCGGCTGGGTG
TGGCGGACCGCTATCAGGACATAGCGTTGGCTACCCGTGATATTGCTGAAGAGCTTGGCGGCGAATGGG
CTGACCGCTTCTCTGCTTACGGTATCGCCGCTCCCGATTGCGAGCGCATCGCCTTCTATCGCCTTCTT
GACGAGTCTTCTGACGGGACTCTGGGGTACGCGTAATACGACTCACTATAGGGTCTAGAGACCGGGGA
```

4219502

```
taactgcccctccgggtgaccgcccgtgctgatcggtaacgaagaatgagcagaatggaaccgctcccgccggtacttcagccagcggagagcgc
aatcaaccagtgcaaacggctatcgtgaacctgacgcaagatcaaggccgagggcggggtaaatcctatggggccacagagagcgtcttgaeta
ccaggcgaagcggcggcctgctcaacaagaccctgcccgggtaaccggcggcagcggcaaacgaaicggaaacctcaaccggagcgtgacgcg
ttctcaccgcccctggcggccgcatatcgaactcttgatctacaacagcagacgggctcaatcccaggaaatccgatacagccgggagcagtc
aagcgtcccgtcgaagataaccgagaccgtaaccgcccgggagcgtcgttgaagactggcagtaacggcagctcgtcaactggcaagcgcg
ccatgctcgtctga
```

4218991

END

## The sequence of *MAP3776c* disrupted by the $\Phi$ MycoMarT7 transposon.

The entirety of the *MAP3776c* gene containing the transposon is shown.

Lower-case letters indicate nucleotides from *MAP3776c*, while the upper-case letters indicate nucleotides from the transposon.

Numbers indicate the standard nucleotide number in MAP.

Highlighting shows the features of the transposon: blue = inverted Himar repeats; gray = ori6K, yellow = neomycin phosphotransferase. Red, italicized letters show outward-facing T7 promoter sites. The Genbank accession numbers for *MAP3776c* and the transposon are AE016958.1 and AF411123, respectively (adapted from (61)).

**Fig. S3**

ABC-type metal ion transport system, periplasmic component/surface adhesin [Mycobacterium avium subsp. paratuberculosis S397]  
Sequence ID: [gblEGO39095.1](#) Length: 263 Number of Matches: 1

Range 1: 1 to 263 [GenPept](#) [Graphics](#) ▼ Next Match ▲ Previous Match

| Score          | Expect                                                         | Method                       | Identities   | Positives    | Gaps      |
|----------------|----------------------------------------------------------------|------------------------------|--------------|--------------|-----------|
| 530 bits(1364) | 0.0                                                            | Compositional matrix adjust. | 261/263(99%) | 262/263(99%) | 0/263(0%) |
| Query 107      | VVSVDQMGDIVSELGGACANVKTVLASSSVDPHDYEPSPADAADFMMNAKLIVVNGAGYDS  |                              |              | 166          |           |
|                | +VVSVDQMGDIVSELGGACANVKTVLASSSVDPHDYEPSPADAADFMMNAKLIVVNGAGYDS |                              |              |              |           |
| Sbjct 1        | MVSVDQMGDIVSELGGACANVKTVLASSSVDPHDYEPSPADAADFMMNAKLIVVNGAGYDS  |                              |              | 60           |           |
| Query 167      | WASKLAGSSASGAPLVSAAAVTTTPDGANPHLWYLPASVAVADAVTQELSRMEPPAAGY    |                              |              | 226          |           |
|                | WASKLAGSSASGAPLVSAAAVTTTPDGANPHLWYLPASVAVADAVTQELSRMEPPAAGY    |                              |              |              |           |
| Sbjct 61       | WASKLAGSSASGAPLVSAAAVTTTPDGANPHLWYLPASVAVADAVTQELSRMEPPAAGY    |                              |              | 120          |           |
| Query 227      | FSQRRAQFTSATRLVNLIAKIKAEAAGKSYGATETVFDYQAQAAGLVNKTPEGYRRASA    |                              |              | 286          |           |
|                | FSQRRAQFTSATRLVNLIAKIKAEAAGKSYGATETVFDYQAQAAGLVNKTPEGYRRASA    |                              |              |              |           |
| Sbjct 121      | FSQRRAQFTSATRLVNLIAKIKAEAAGKSYGATETVFDYQAQAAGLVNKTPEGYRRASA    |                              |              | 180          |           |
| Query 287      | NESEPSPGDVAFLDALAGRHDLLIYNTQTEGSIPEEIRSAEQSSVPVVKITETVPPG      |                              |              | 346          |           |
|                | NESEPS DVAFLDALAGRHDLLIYNTQTEGSIPEEIRSAEQSSVPVVKITETVPPG       |                              |              |              |           |
| Sbjct 181      | NESESPRDVAFLDALAGRHDLLIYNTQTEGSIPEEIRSAEQSSVPVVKITETVPPG       |                              |              | 240          |           |
| Query 347      | ETSFEDWQYGQLVQLAKALHVAV                                        |                              |              | 369          |           |
|                | ETSFEDWQYGQLVQLAKALHVAV                                        |                              |              |              |           |
| Sbjct 241      | ETSFEDWQYGQLVQLAKALHVAV                                        |                              |              | 263          |           |

**Comparison of the *M. avium* subsp. *paratuberculosis* K-10 (Query) MAP3776c protein with that of S397 (Sbjct).**

Alignment was generated by Protein BLAST. Last accessed July 5, 2015

## Fig. S4

Predicted transcript (KEGG) – black

Proposed transcript (our work/MAP-sheep)– red

Blue – transcript start site identified in this RACE experiment

```
atggcgacggtgggcgcatggtgccgctcggggcggccagccggggtcccgcggaaccgg
gccggcgcgaccgcgacgcggaccgcgtttccggaaagtctcgcgcattagatatgaaa
acggttatcgtttgcggtgtgggtgggttgcctcgcggtggcacggcgcccctatcgtc
actgtcctggtgctgacagtcgtaacgagttgctcgtcaagcccgaaccaaacagccgag
gggtcccgtaatgcccctcgccatcagccattggcagaacggccgcgcccgtgtccc
accgccccactcgtctgtcgtggtcagcgtggatcagtggggcgacattgtctccgagctg
ggcggcgccctgcgcgaaagtcaagaccgtgctcgccagctcgtcggtegacccgcacgat
tacgagccgtcaccggccgacgccgctgactttatgaacgcgaaacttatcgtggtcaac
ggtgcagggtacgactcgtggcatccaagctggccggcagctccgcttccggtgcccc
ttggtgagcgcgcggcagtcacgacaacaccggatggagccaaccctcacctgtggtac
ctgccctccgcggtgaccgcccgttgcctgatgcggtaacgcaagaattgagcagaatggaa
ccgctgcccgggtaacttcagccagcggagagcgcaattcaccagtgcgacaaggcta
tacgtgaacctgatcgccaagatcaaggccgagggcggcgggtaaatcctatggggccaca
gagacggtctttgactaccaggcgcaagcggcgggctggtcaacaagaccctgccggg
taccggcgggcatcgccaacgaatcggaaccctcaccggagacggtgacgcgttctc
accgcccttgccggccggcatatcgacctcttgatctacaacacgcagaccgagggctca
atccccgaggaaatccgatcagccgaggagcagtcgaagcgtgcccgctcgtcaagataacc
gagaccgtaccgcccggggagacgtcgtttgaagactggcagtacgggcagctcgtccaa
ctggccaaggcgtccatgtcgtctga
```

**Transcription start site of *MAP3776c* identified by 5' RACE.**

**Fig. S5**

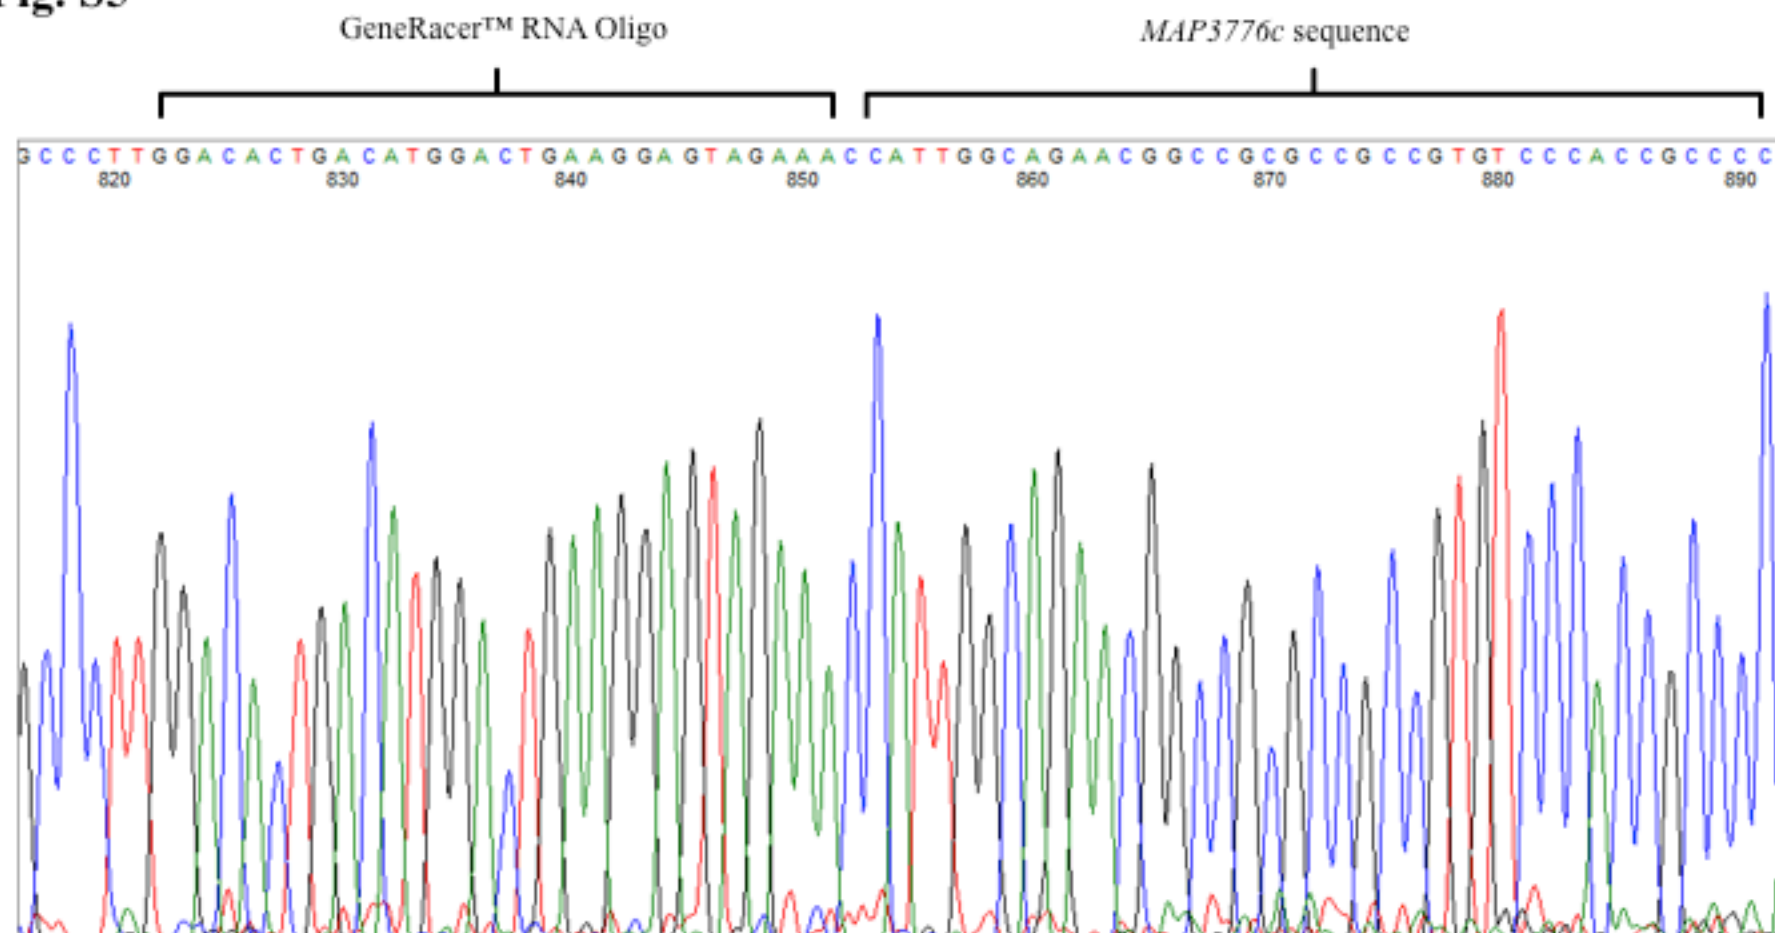

**Partial sequence chromatogram of 5'-RACE showing the fusion of RNA oligo and *MAP3776c*. Visualized with FinchTV (<http://www.geospiza.com/Products/finchtv.shtml>).**
